# Supplementary material
Source: Springer Nature journal article supplement (https://www.springermedizin.de/resource/supplementary/12901_2011_85_MOESM3_ESM.pdf/9515214)

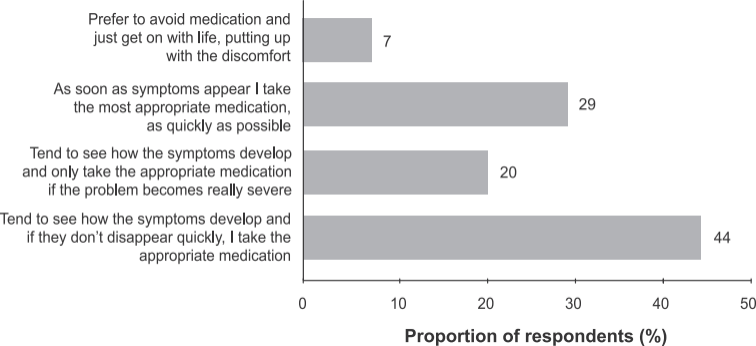

Supplement: MOESM3 [file 9515214]
